# Supplementary figures and images for: Δ9–Tetrahydrocannabinol (THC)-Rich Compositions from Cannabis Have Cytotoxic Activity Against Ovarian Cancer Cells and Act Synergistically With Niraparib in vitro
Source: Preprints.org preprint supplement (doi:10.20944/preprints202109.0179.v1), 2021-09-09

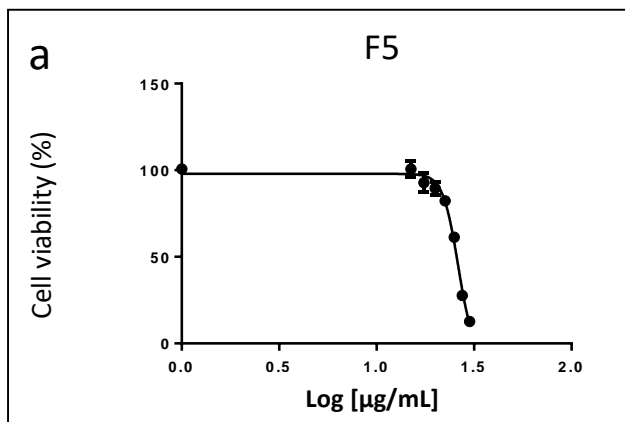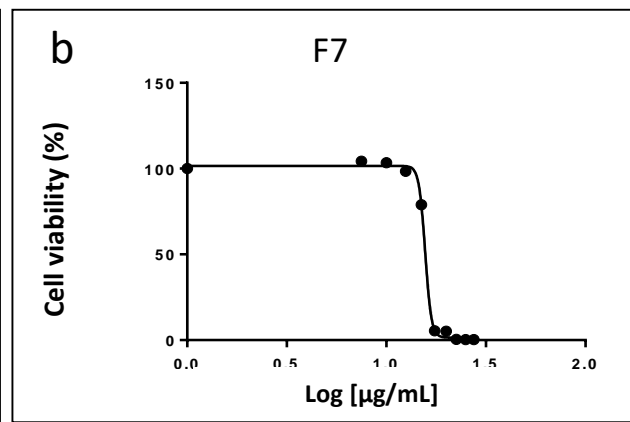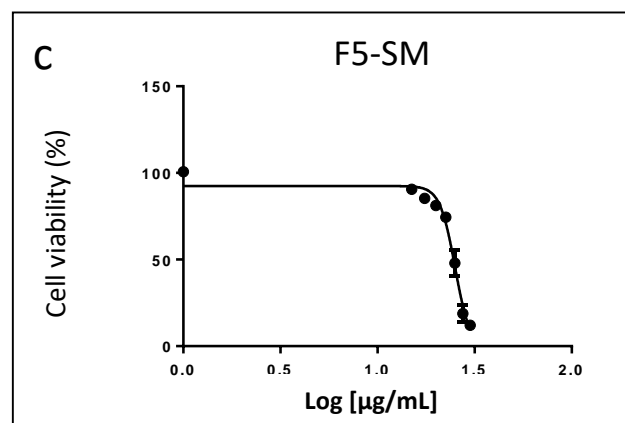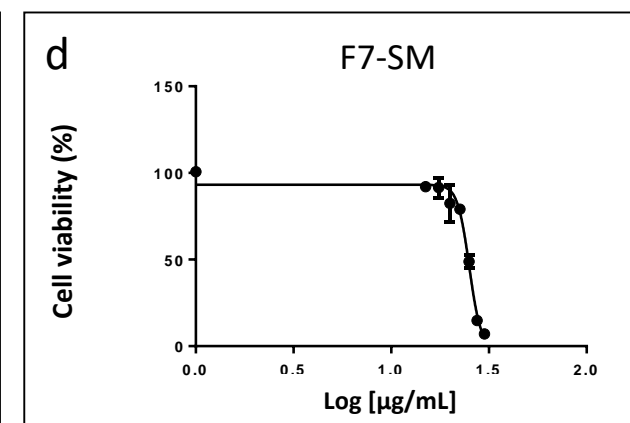

Supplement: Supplementary file 1 [file Sup Fig S1.pdf › Sup Fig S1.pdf]

a

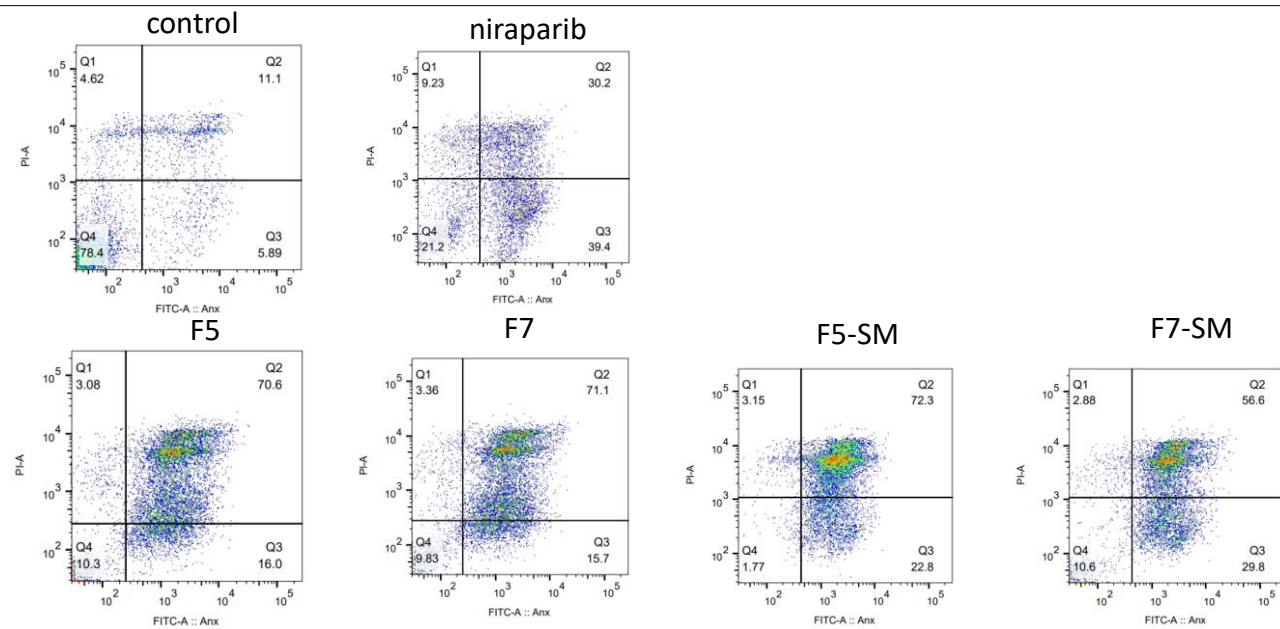

b

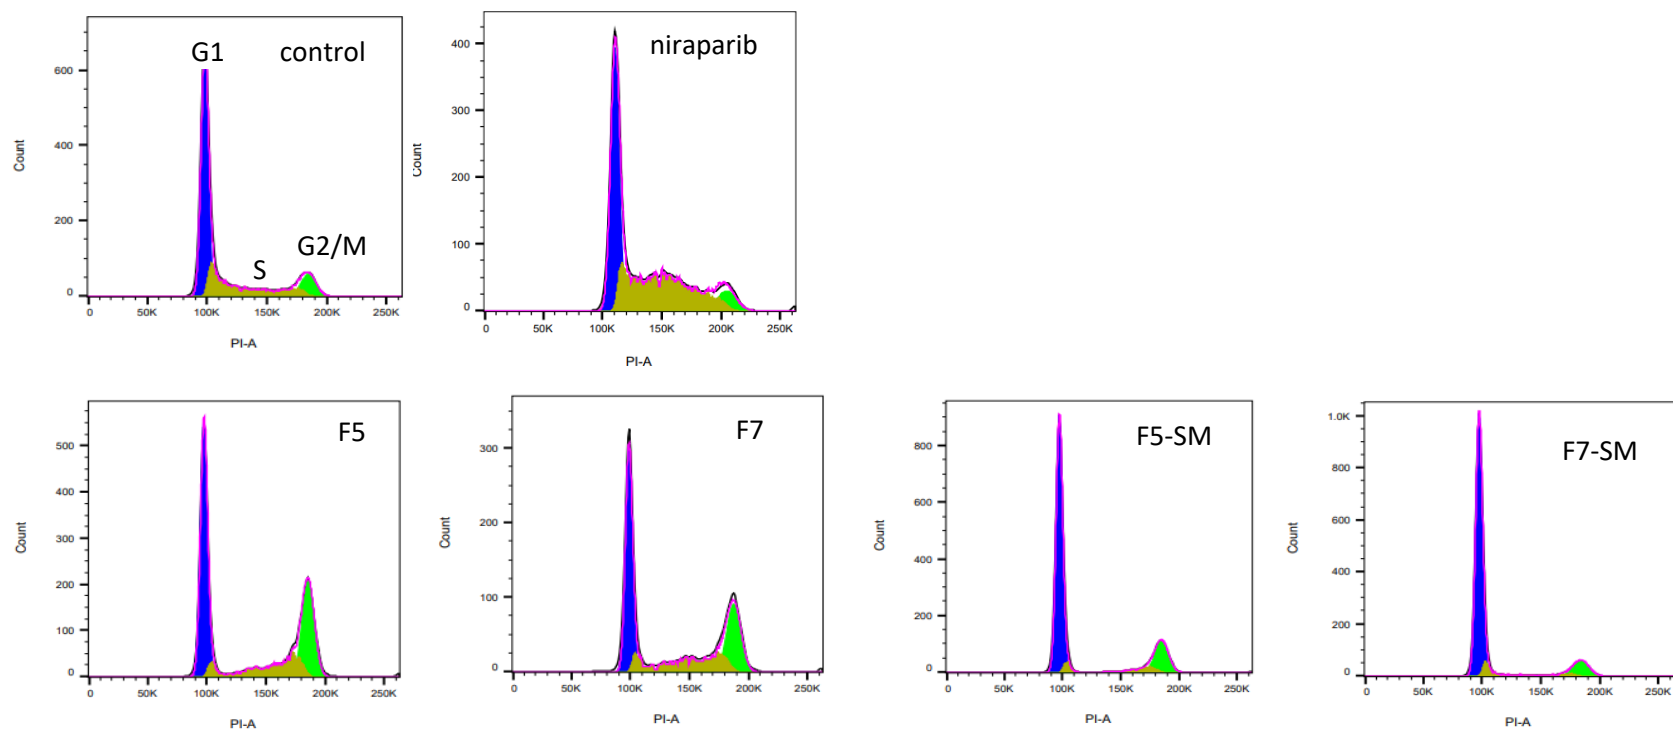

Supplement: Supplementary file 2 [file Sup Fig S2.pdf › Sup Fig S2.pdf]
